# Supplementary material for: Chiral Synthesis of 3-Amino-1-phenylbutane by a Multi-Enzymatic Cascade System
Source: MDPI journal article supplement (doi:10.3390/catal11080973), 2021-08-14
Supplement: s1 [file s1]

*Supplementary Materials*

# Chiral Synthesis of 3-Amino-1-phenylbutane by a Multi- Enzymatic Cascade System

Natàlia Alcover, Gregorio Álvaro and Marina Guillén \*

Department of Chemical, Biological and Environmental Engineering, Universitat Autònoma de Barcelona, 08193 Bellaterra, Spain; natalia.alcover@uab.cat (N.A.); gregorio.alvaro@uab.cat (G.Á.)

\* Correspondence: marina.guillen@uab.cat; Tel.: +34-93-5814695

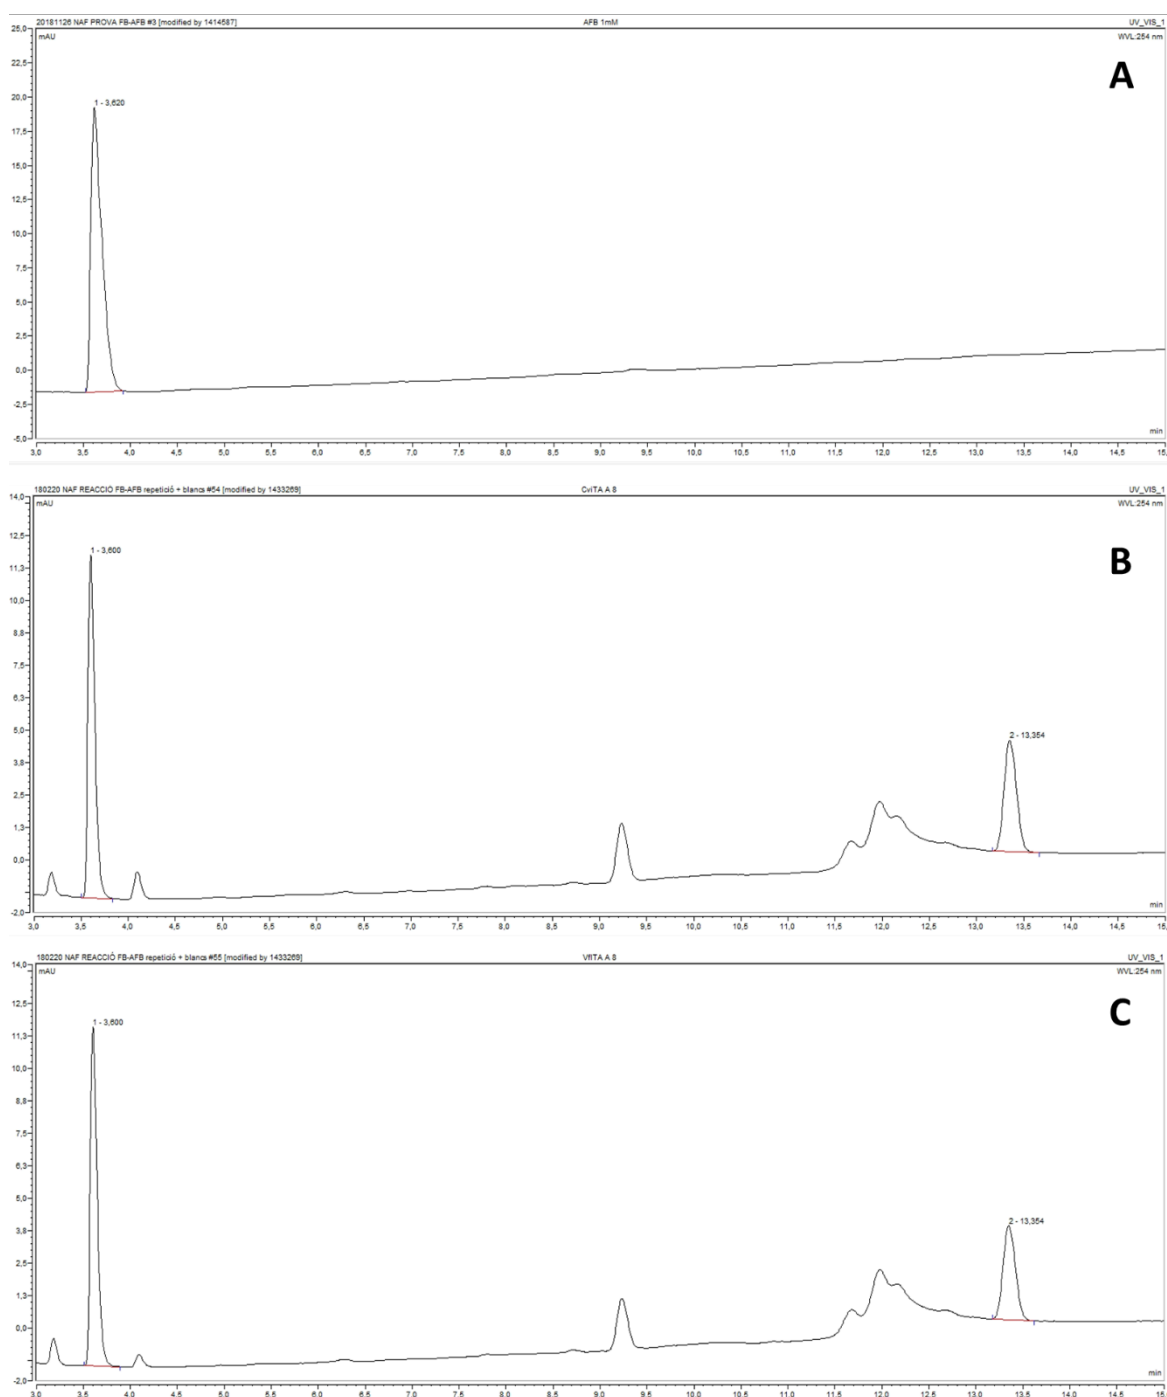

**Figure S1.** HPLC chromatogram of (A) 1mM commercial 3-APB from Sigma Aldrich (St. Louis, MO, USA), (B) final sample (24 h) of 3-APB synthesis catalyzed by CviTA and PDC and (C) final sample (24h) of 3-APB synthesis catalyzed by CviTA and PDC. Reactions were performed as follows: 5% v v<sup>-1</sup> transaminase cell lysate, 25% v v<sup>-1</sup> PDC cell lysate, 1 mM pyridoxal-5'-phosphate (PLP), 0.1 mM thiamine pyrophosphate (TPP), 0.1 mM MgCl<sub>2</sub>, 200 mM alanine and 10 mM 4-phenyl-2-butanone (PB) in 150 mM of potassium phosphate buffer, pH 7.5, at 30 °C and 1000 rpm. Analysis were performed in an UltiMate 3000 (Dionex)HPLC equipped with a variable wavelength detector using a CORTECS C18+ 2.7  $\mu$ m 4.6  $\times$  150mm column (Waters Milford, MA, USA). 3-APB retention time: 3.6 min.

**Table S1.** 4-PB and 3-APB concentrations used for Figure 4A plotting. Reaction conditions: 30°C; pH 7.5; 4-PB 10 mM; L-Alanine 200 mM; CviTA 5% v v<sup>-1</sup>; PDC 25% v v<sup>-1</sup>; 1 mM pyridoxal-5'-phosphate (PLP), 0.1 mM thiamine pyrophosphate (TPP) and 0.1 mM MgCl<sub>2</sub>.

| Time<br>(h) | 4-PB             | 4-PB             | 4-PB            | 4-PB          | 3-APB            | 3-APB            | 3-APB           | 3-APB         |
|-------------|------------------|------------------|-----------------|---------------|------------------|------------------|-----------------|---------------|
|             | Sample 1<br>(mM) | Sample 2<br>(mM) | Average<br>(mM) | Error<br>(mM) | Sample 1<br>(mM) | Sample 2<br>(mM) | Average<br>(mM) | Error<br>(mM) |
| 0           | 9.65             | 9.65             | 9.65            | 0.00          | 0.00             | 0                | 0               | 0.0           |
| 0.5         | 6.34             | 6.19             | 6.27            | 0.07          | 3.92             | 2.85             | 3.38            | 0.53          |
| 1           | 5.01             | 4.60             | 4.81            | 0.20          | 5.22             | 3.78             | 4.50            | 0.72          |
| 2           | 3.69             | 4.34             | 4.02            | 0.33          | 6.25             | 4.83             | 5.54            | 0.71          |
| 4           | 2.79             | 3.56             | 3.18            | 0.39          | 6.97             | 5.20             | 6.08            | 0.89          |
| 8           | 2.40             | 2.99             | 2.70            | 0.30          | 7.18             | 5.22             | 6.20            | 0.98          |

**Table S2.** 4-PB and 3-APB concentrations used for Figure 4A plotting. Reaction conditions: 30°C; pH 7.5; 4-PB 10 mM; L-Alanine 200 mM; CviTA 5% v v<sup>-1</sup>; 1 mM pyridoxal-5'-phosphate (PLP), 0.1 mM thiamine pyrophosphate (TPP) and 0.1 mM MgCl<sub>2</sub>.

| Time<br>(h) | 4-PB             | 4-PB             | 4-PB            | 4-PB          | 3-APB            | 3-APB            | 3-APB           | 3-APB         |
|-------------|------------------|------------------|-----------------|---------------|------------------|------------------|-----------------|---------------|
|             | Sample 1<br>(mM) | Sample 2<br>(mM) | Average<br>(mM) | Error<br>(mM) | Sample 1<br>(mM) | Sample 2<br>(mM) | Average<br>(mM) | Error<br>(mM) |
| 0           | 11.23            | 8.17             | 9.70            | 1.53          | 0.00             | 0.00             | 0.00            | 0             |
| 0.5         | 10.02            | 9.81             | 9.92            | 0.10          | 0.66             | 0.70             | 0.68            | 0.02          |
| 1           | 9.44             | 9.58             | 9.51            | 0.07          | 0.62             | 0.71             | 0.66            | 0.04          |
| 2           | 9.12             | 8.83             | 8.97            | 0.14          | 0.59             | 0.75             | 0.67            | 0.08          |
| 4           | 8.33             | 8.02             | 8.18            | 0.15          | 0.51             | 0.66             | 0.59            | 0.08          |
| 8           | 7.59             | 7.06             | 7.33            | 0.26          | 0.58             | 0.58             | 0.58            | 0.00          |

**Table S3.** 4-PB and 3-APB concentrations used for Figure 4C plotting. Reaction conditions: 30°C; pH 7.5; 4-PB 10 mM; L-Alanine 200 mM; VfiTA 5% v v<sup>-1</sup>; PDC 25% v v<sup>-1</sup>; 1 mM pyridoxal-5'-phosphate (PLP), 0.1 mM thiamine pyrophosphate (TPP) and 0.1 mM MgCl<sub>2</sub>.

| Time<br>(h) | 4-PB             | 4-PB             | 4-PB            | 4-PB          | 3-APB           | 3-APB            | 3-APB           | 3-APB         |
|-------------|------------------|------------------|-----------------|---------------|-----------------|------------------|-----------------|---------------|
|             | Sample 1<br>(mM) | Sample 2<br>(mM) | Average<br>(mM) | Error<br>(mM) | Sample1<br>(mM) | Sample 2<br>(mM) | Average<br>(mM) | Error<br>(mM) |
| 0           | 9.73             | 9.75             | 9.74            | 0.01          | 0.00            | 0.00             | 0.00            | 0.0           |
| 0.5         | 9.10             | 7.03             | 8.06            | 1.03          | 1.55            | 1.17             | 1.36            | 0.19          |
| 1           | 7.63             | 5.66             | 6.65            | 0.98          | 2.91            | 2.80             | 2.85            | 0.06          |
| 2           | 5.48             | 4.42             | 4.95            | 0.53          | 4.81            | 4.19             | 4.50            | 0.31          |
| 4           | 3.94             | 3.34             | 3.64            | 0.30          | 6.10            | 5.07             | 5.58            | 0.51          |
| 8           | 3.11             | 2.53             | 2.82            | 0.29          | 6.56            | 5.29             | 5.92            | 0.64          |

**Table S4.** 4-PB and 3-APB concentrations used for Figure 4C plotting. Reaction conditions: 30°C; pH 7.5; 4-PB 10 mM; L-Alanine 200 mM; VfiTA 5% v v<sup>-1</sup>, 1 mM pyridoxal-5'-phosphate (PLP), 0.1 mM thiamine pyrophosphate (TPP) and 0.1 mM MgCl<sub>2</sub>.

| Time (h) | 4-PB Sample 1 (mM) | 4-PB Sample 2 (mM) | 4-PB Average (mM) | 4-PB Error (mM) | 3-APB Sample 1 (mM) | 3-APB Sample 2 (mM) | 3-APB Average (mM) | 3-APB Error (mM) |
|----------|--------------------|--------------------|-------------------|-----------------|---------------------|---------------------|--------------------|------------------|
| 0        | 11.42              | 8.49               | 9.96              | 1.47            | 0.00                | 0.00                | 0.00               | 0.0              |
| 0.5      | 10.48              | 10.03              | 10.26             | 0.22            | 0.55                | 0.70                | 0.63               | 0.07             |
| 1        | 9.98               | 9.76               | 9.87              | 0.11            | 0.65                | 0.81                | 0.73               | 0.08             |
| 2        | 9.33               | 9.29               | 9.31              | 0.02            | 0.77                | 0.87                | 0.82               | 0.05             |
| 4        | 8.92               | 8.21               | 8.56              | 0.35            | 0.89                | 0.92                | 0.90               | 0.01             |
| 8        | 7.79               | 7.29               | 7.54              | 0.25            | 0.96                | 1.06                | 1.01               | 0.05             |

**Table S5.** 3-APB concentration used for Figure 5A plotting. Reaction conditions: 15°C, pH 7.5; 4-PB 10 mM; L-Alanine 200 mM; CviTA 5% v v<sup>-1</sup>; PDC 25% v v<sup>-1</sup>, 1 mM pyridoxal 5' phosphate (PLP), 0.1 mM thiamine pyrophosphate (TPP) and 0.1 mM MgCl<sub>2</sub>.

| Time (h) | 3-APB Sample 1 (mM) | 3-APB Sample 2 (mM) | 3-APB Average (mM) | 3-APB Error (mM) |
|----------|---------------------|---------------------|--------------------|------------------|
| 0        | 0.00                | 0.00                | 0.00               | 0.0              |
| 1        | 2.58                | 2.54                | 2.56               | 0.02             |
| 2        | 4.14                | 4.16                | 4.15               | 0.01             |
| 4        | 5.79                | 5.83                | 5.81               | 0.02             |
| 8        | 6.93                | 6.87                | 6.90               | 0.03             |
| 24       | 7.63                | 7.73                | 7.68               | 0.05             |

**Table S6.** 3-APB concentration used for Figure 5A plotting. Reaction conditions: 30°C, pH 7.5; 4-PB 10 mM; L-Alanine 200 mM; CviTA 5% v v<sup>-1</sup>; PDC 25% v v<sup>-1</sup>, 1 mM pyridoxal-5'-phosphate (PLP), 0.1 mM thiamine pyrophosphate (TPP) and 0.1 mM MgCl<sub>2</sub>.

| Time (h) | 3-APB Sample 1 (mM) | 3-APB Sample 2 (mM) | 3-APB Average (mM) | 3-APB Error (mM) |
|----------|---------------------|---------------------|--------------------|------------------|
| 0        | 0.00                | 0.00                | 0.00               | 0.0              |
| 0.5      | 3.92                | 2.85                | 3.38               | 0.53             |
| 1        | 5.22                | 3.78                | 4.50               | 0.72             |
| 2        | 6.25                | 4.83                | 5.54               | 0.71             |
| 4        | 6.97                | 5.20                | 6.08               | 0.89             |
| 8        | 7.18                | 5.22                | 6.20               | 0.98             |

**Table S7.** 3-APB concentration used for Figure 5A plotting. Reaction conditions: 40°C, pH 7.5; 4-PB 10 mM; L-Alanine 200 mM; CviTA 5% v v<sup>-1</sup>; PDC 25% v v<sup>-1</sup>, 1 mM pyridoxal-5'-phosphate (PLP), 0.1 mM thiamine pyrophosphate (TPP) and 0.1 mM MgCl<sub>2</sub>.

| Time (h) | 3-APB<br>Sample 1<br>(mM) | 3-APB<br>Sample 2<br>(mM) | 3-APB<br>Average<br>(mM) | 3-APB<br>Error<br>(mM) |
|----------|---------------------------|---------------------------|--------------------------|------------------------|
| 0        | 0                         | 0                         | 0                        | 0                      |
| 0.5      | 3.53                      | 3.67                      | 3.60                     | 0.07                   |
| 1        | 4.08                      | 4.26                      | 4.17                     | 0.09                   |
| 2        | 4.29                      | 4.80                      | 4.55                     | 0.26                   |
| 4        | 3.81                      | 4.49                      | 4.15                     | 0.34                   |
| 8        | 2.54                      | 3.62                      | 3.08                     | 0.54                   |

**Table S8.** 3-APB concentration used for Figure 5C plotting. Reaction conditions: 15°C, pH 7.5; 4-PB 10 mM; L-Alanine 200 mM; VfiTA 5% v v<sup>-1</sup>; PDC 25% v v<sup>-1</sup>, 1 mM pyridoxal-5'-phosphate (PLP), 0.1 mM thiamine pyrophosphate (TPP) and 0.1 mM MgCl<sub>2</sub>.

| Time (h) | 3-APB<br>Sample 1<br>(mM) | 3-APB<br>Sample 2<br>(mM) | 3-APB<br>Average<br>(mM) | 3-APB<br>Error<br>(mM) |
|----------|---------------------------|---------------------------|--------------------------|------------------------|
| 0        | 0                         | 0                         | 0                        | 0                      |
| 1        | 0.16                      | 0.18                      | 0.17                     | 0.01                   |
| 2        | 0.37                      | 0.43                      | 0.40                     | 0.03                   |
| 4        | 0.98                      | 1.08                      | 1.03                     | 0.05                   |
| 8        | 2.03                      | 2.35                      | 2.19                     | 0.16                   |
| 24       | 4.63                      | 5.32                      | 4.98                     | 0.34                   |
| 30       | 5.00                      | 5.92                      | 5.46                     | 0.46                   |
| 48       | 5.42                      | 6.42                      | 5.92                     | 0.50                   |

**Table S9.** 3-APB concentration used for Figure 5C plotting. Reaction conditions: 30°C, pH 7.5; 4-PB 10 mM; L-Alanine 200 mM; VfiTA 5% v v<sup>-1</sup>; PDC 25% v v<sup>-1</sup>, 1 mM pyridoxal-5'-phosphate (PLP), 0.1 mM thiamine pyrophosphate (TPP) and 0.1 mM MgCl<sub>2</sub>.

| Time (h) | 3-APB<br>Sample 1<br>(mM) | 3-APB<br>Sample 2<br>(mM) | 3-APB<br>Average<br>(mM) | 3-APB<br>Error<br>(mM) |
|----------|---------------------------|---------------------------|--------------------------|------------------------|
| 0        | 0                         | 0                         | 0                        | 0                      |
| 0.5      | 1.55                      | 1.17                      | 1.36                     | 0.19                   |
| 1        | 2.91                      | 2.79                      | 2.85                     | 0.06                   |
| 2        | 4.81                      | 4.19                      | 4.50                     | 0.31                   |
| 4        | 6.10                      | 5.07                      | 5.58                     | 0.51                   |
| 8        | 6.56                      | 5.28                      | 5.92                     | 0.64                   |

**Table S10.** 3-APB concentration used for Figure 5C plotting. Reaction conditions: 40°C, pH 7.5; 4-PB 10 mM; L-Alanine 200 mM; VfiTA 5% v v<sup>-1</sup>; PDC 25% v v<sup>-1</sup>, 1 mM pyridoxal-5'-phosphate (PLP), 0.1 mM thiamine pyrophosphate (TPP) and 0.1 mM MgCl<sub>2</sub>.

| Time (h) | 3-APB<br>Sample 1<br>(mM) | 3-APB<br>Sample 2<br>(mM) | 3-APB<br>Average<br>(mM) | 3-APB<br>Error<br>(mM) |
|----------|---------------------------|---------------------------|--------------------------|------------------------|
| 0        | 0                         | 0                         | 0                        | 0                      |
| 0.5      | 2.83                      | 2.99                      | 2.91                     | 0.08                   |
| 1        | 3.89                      | 3.77                      | 3.83                     | 0.06                   |
| 2        | 4.46                      | 4.14                      | 4.30                     | 0.16                   |
| 4        | 4.30                      | 3.49                      | 3.90                     | 0.40                   |
| 8        | 2.75                      | 1.85                      | 2.30                     | 0.45                   |

**Table S11.** 3-APB concentration used for Figure 6A plotting. Reaction conditions: L-Alanine 200 mM, 30°C; pH 7.5; 4-PB 10 mM; CviTA 5% v v<sup>-1</sup>; PDC 25% v v<sup>-1</sup>, 1 mM pyridoxal-5'-phosphate (PLP), 0.1 mM thiamine pyrophosphate (TPP) and 0.1 mM MgCl<sub>2</sub>.

| Time (h) | 3-APB<br>Sample1<br>(mM) | 3-APB<br>Sample 2<br>(mM) | 3-APB<br>Average<br>(mM) | 3-APB<br>Error<br>(mM) |
|----------|--------------------------|---------------------------|--------------------------|------------------------|
| 0        | 0                        | 0                         | 0                        | 0                      |
| 0.5      | 3.92                     | 2.85                      | 3.38                     | 0.53                   |
| 1        | 5.22                     | 3.78                      | 4.50                     | 0.72                   |
| 2        | 6.25                     | 4.83                      | 5.54                     | 0.71                   |
| 4        | 6.97                     | 5.20                      | 6.08                     | 0.89                   |
| 8        | 7.18                     | 5.22                      | 6.20                     | 0.98                   |

**Table S12.** 3-APB concentration used for Figure 6A plotting. Reaction conditions: L-Alanine 400 mM, 30°C; pH 7.5; 4-PB 10 mM; CviTA 5% v v<sup>-1</sup>; PDC 25% v v<sup>-1</sup>, 1 mM pyridoxal-5'-phosphate (PLP), 0.1 mM thiamine pyrophosphate (TPP) and 0.1 mM MgCl<sub>2</sub>.

| Time (h) | 3-APB<br>Sample 1<br>(mM) | 3-APB<br>Sample 2<br>(mM) | 3-APB<br>Average<br>(mM) | 3-APB<br>Error<br>(mM) |
|----------|---------------------------|---------------------------|--------------------------|------------------------|
| 0        | 0                         | 0                         | 0                        | 0                      |
| 0.5      | 3.49                      | 4.10                      | 3.79                     | 0.30                   |
| 1        | 4.54                      | 5.44                      | 4.99                     | 0.45                   |
| 2        | 5.68                      | 6.12                      | 5.90                     | 0.22                   |
| 4        | 6.29                      | 6.28                      | 6.29                     | 0.01                   |
| 8        | 5.87                      | 6.57                      | 6.22                     | 0.35                   |

**Table 13.** 3-APB concentration used for Figure 6A plotting. Reaction conditions: L-Alanine 600 mM, 30°C; pH 7.5; 4-PB 10 mM; CviTA 5% v v<sup>-1</sup>; PDC 25% v v<sup>-1</sup>, 1 mM pyridoxal-5'-phosphate (PLP), 0.1 mM thiamine pyrophosphate (TPP) and 0.1 mM MgCl<sub>2</sub>.

| Time (h) | 3-APB<br>Sample 1<br>(mM) | 3-APB<br>Sample 2<br>(mM) | 3-APB<br>Average<br>(mM) | 3-APB<br>Error<br>(mM) |
|----------|---------------------------|---------------------------|--------------------------|------------------------|
| 0        | 0.22                      | 0.12                      | 0.17                     | 0.05                   |
| 0.5      | 4.17                      | 4.72                      | 4.44                     | 0.27                   |
| 1        | 5.41                      | 6.01                      | 5.71                     | 0.30                   |
| 2        | 6.55                      | 6.63                      | 6.60                     | 0.04                   |
| 4        | 6.68                      | 6.61                      | 6.65                     | 0.03                   |
| 8        | 6.93                      | 6.82                      | 6.88                     | 0.06                   |

**Table S14.** 3-APB concentration used for Figure 6C plotting. Reaction conditions: L-Alanine 200 mM, 30°C; pH 7.5; 4-PB 10 mM; VfiTA 5% v v<sup>-1</sup>; PDC 25% v v<sup>-1</sup>, 1 mM pyridoxal-5'-phosphate (PLP), 0.1 mM thiamine pyrophosphate (TPP) and 0.1 mM MgCl<sub>2</sub>.

| Time (h) | 3-APB<br>Sample 1<br>(mM) | 3-APB<br>Sample 2<br>(mM) | 3-APB<br>Average<br>(mM) | 3-APB<br>Error<br>(mM) |
|----------|---------------------------|---------------------------|--------------------------|------------------------|
| 0        | 0                         | 0                         | 0                        | 0                      |
| 0.5      | 1.55                      | 1.17                      | 1.36                     | 0.19                   |
| 1        | 2.91                      | 2.79                      | 2.85                     | 0.06                   |
| 2        | 4.81                      | 4.19                      | 4.50                     | 0.31                   |
| 4        | 6.10                      | 5.07                      | 5.58                     | 0.51                   |
| 8        | 6.56                      | 5.28                      | 5.92                     | 0.64                   |

**Table S15.** 3-APB concentration used for Figure 6C plotting. Reaction conditions: L-Alanine 400 mM, 30°C; pH 7.5; 4-PB 10 mM; VfiTA 5% v v<sup>-1</sup>; PDC 25% v v<sup>-1</sup>, 1 mM pyridoxal-5'-phosphate (PLP), 0.1 mM thiamine pyrophosphate (TPP) and 0.1 mM MgCl<sub>2</sub>.

| Time (h) | 3-APB<br>Sample 1<br>(mM) | 3-APB<br>Sample 2<br>(mM) | 3-APB<br>Average<br>(mM) | 3-APB<br>Error<br>(mM) |
|----------|---------------------------|---------------------------|--------------------------|------------------------|
| 0        | 0                         | 0                         | 0                        | 0                      |
| 0.5      | 1.23                      | 1.58                      | 1.41                     | 0.17                   |
| 1        | 2.50                      | 3.31                      | 2.90                     | 0.40                   |
| 2        | 4.60                      | 5.63                      | 5.11                     | 0.52                   |
| 4        | 6.03                      | 6.47                      | 6.25                     | 0.22                   |
| 8        | 6.35                      | 6.85                      | 6.60                     | 0.25                   |

**Table S16.** 3-APB concentration used for Figure 6C plotting. Reaction conditions: L-Alanine 600 mM, 30°C; pH 7.5; 4-PB 10 mM; VflTA 5% v v<sup>-1</sup>; PDC 25% v v<sup>-1</sup>, 1 mM pyridoxal-5'-phosphate (PLP), 0.1 mM thiamine pyrophosphate (TPP) and 0.1 mM MgCl<sub>2</sub>.

| Time (h) | 3-APB<br>Sample 1<br>(mM) | 3-APB<br>Sample 2<br>(mM) | 3-APB<br>Average<br>(mM) | 3-APB<br>Error<br>(mM) |
|----------|---------------------------|---------------------------|--------------------------|------------------------|
| 0        | 0                         | 0                         | 0                        | 0                      |
| 0.5      | 1.17                      | 1.87                      | 1.52                     | 0.35                   |
| 1        | 2.79                      | 3.86                      | 3.32                     | 0.53                   |
| 2        | 5.25                      | 5.65                      | 5.45                     | 0.20                   |
| 4        | 6.48                      | 6.82                      | 6.65                     | 0.17                   |
| 8        | 6.91                      | 7.26                      | 7.08                     | 0.18                   |



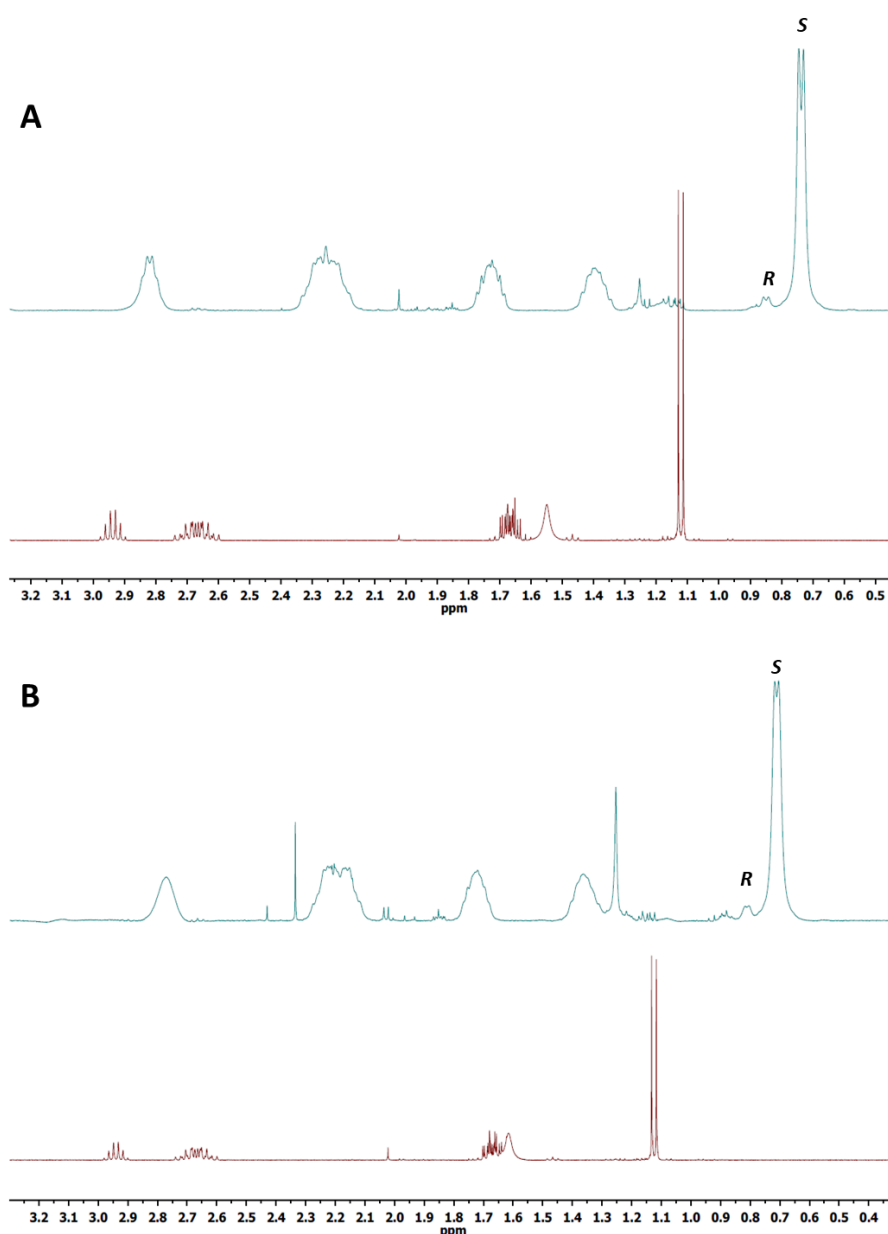

**Figure S2.** Results on nuclear magnetic resonance (NMR) for 3-APB obtained from reactions catalyzed by A) CviTA-PDC and B) VfiTA-PDC before adding chiral solvating agent (red line) and after adding chiral solvating agent (green line). Reaction conditions: 30°C; pH 7.5; 4-PB 10 mM; L-Alanine 200 mM; TA 5% v v<sup>-1</sup>; PDC 25% v v<sup>-1</sup>, 1 mM pyridoxal-5'-phosphate (PLP), 0.1 mM thiamine pyrophosphate (TPP) and 0.1 mM MgCl<sub>2</sub>. NMR was performed using (R)-(-)-1,1'-binaphthyl-2,2'-hydrogenphosphate (BHP) as, chiral solvating agent (CSA). The <sup>1</sup>H-NMR spectra were acquired with a Bruker AVANCE-III 600 MHz NMR Spectrometer (Bruker Biospin, Rheinstetten, Germany) in CDCl<sub>3</sub> at 298 K.
